# Supplementary material for: RapaCaspase-9-based suicide gene applied to the safety of IL-1RAP CAR-T cells
Source: PubMed Central journal article supplement (PMC10506905; doi:10.1038/s41434-023-00404-2), 2023-05-12
Supplement: 41434_2023_404_MOESM1_ESM.pdf [file 41434_2023_404_MOESM1_ESM.pdf]

1                    **RAPACASPASE-9-BASED SUICIDE GENE APPLIED TO THE**

2                    **SAFETY OF IL-1RAP CAR-T CELLS**

3                    *Lucie Bouquet, Walid Warda, Mathieu Neto Da Rocha, Rim Trad, Clémentine Nicod, Rafik*

4                    *Haderbache, Delphine Genin, Christophe Ferrand, Marina Deschamps*

5

6

7                    **Supplemental Figures and Legends**

- 8
- 9                    • **Figure S1. Schematic representation of viral constructs.**
  - 10                  • **Figure S2. Generation of iCasp9-G and iCasp9-A retroviral plasmids.**
  - 11                  • **Figure S3. Generation of RapaCaspase9 suicide gene plasmids.**
  - 12                  • **Figure S4. Functional validation of RapaCasp9-G suicide gene, induced by rapamycin**
  - 13                  **produced for research and Rapamune® pill.**
  - 14                  • **Figure S5 IL-1RAP stimulation validation by CD107a degranulation assay of**
  - 15                  **RapaCasp9-G-expressing GMTCs**
  - 16                  • **Figure S6. Timing improvement for suicide gene induction in RapaCasp9-expressing**
  - 17                  **GMTCs.**
- 18

19 **Figure S1**

20

**A**

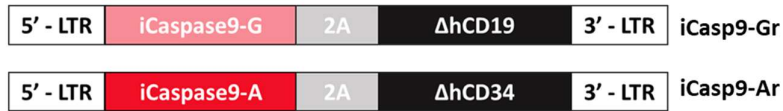

**B**

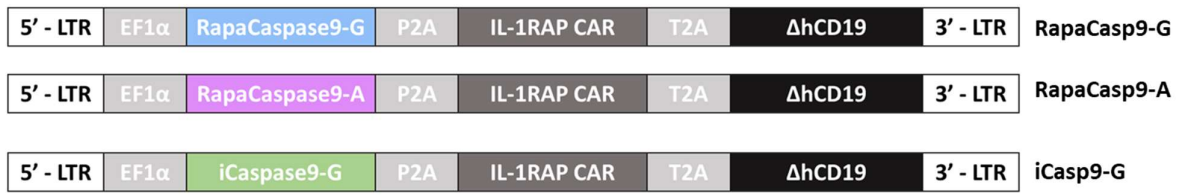

21

22 **Figure S1. Schematic representation of viral constructs.** A. Schematic representation of the  
23 retroviral iCaspase9 constructs, including the suicide gene and a  $\Delta$ CD19. The different  
24 sequences are separated with 2a self-cleaving peptides. B. Schematic representation of the  
25 lentiviral RapaCaspase9 and iCaspase9 constructs, including an EF1 $\alpha$  promoter, the suicide  
26 gene, an IL-1RAP chimeric antigen receptor and a  $\Delta$ CD19. The different sequences are  
27 separated with 2a self-cleaving peptides

28

29 **Figure S2**

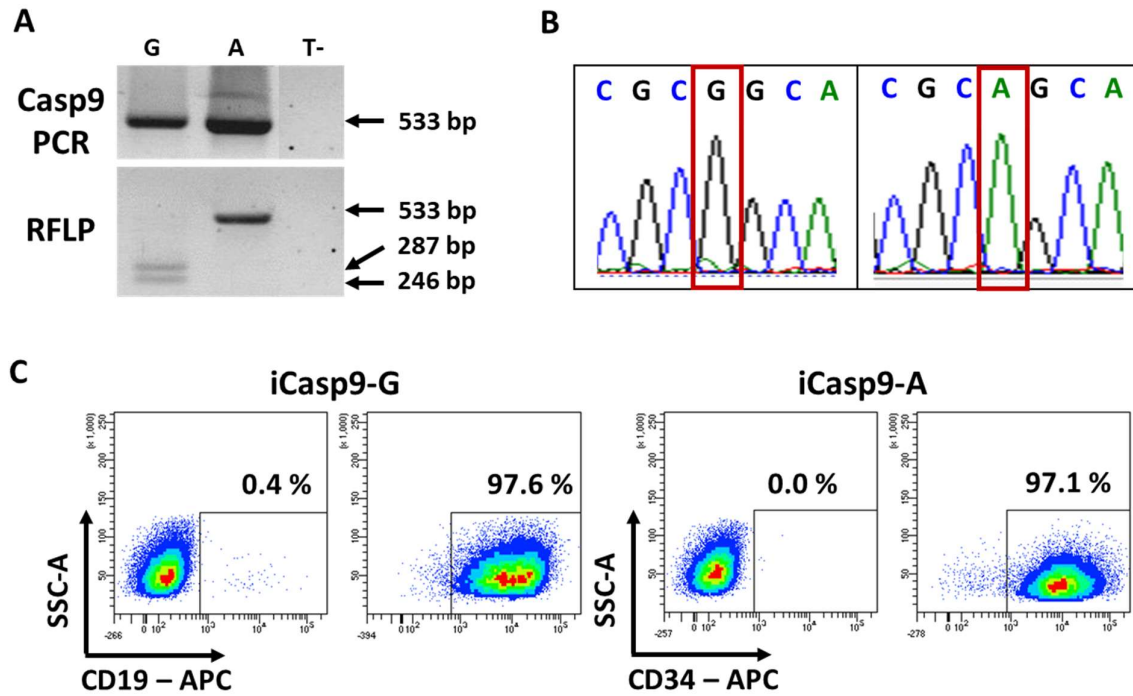

30

31 **Figure S2. Generation of iCasp9-G and iCasp9-A retroviral plasmids.** A. Restriction fragment  
 32 length polymorphism of retroviral iCaspase9 plasmids targeting the site-directed mutagenesis  
 33 site. PCR targeting the Casp9 suicide genes was performed, and the PCR products underwent  
 34 enzymatic restriction with the *Bst*UI enzyme and migration in an agarose gel. The negative  
 35 control (T-) contained water instead of DNA. B. Validation of the site-directed mutagenesis by  
 36 Sanger sequencing of the iCaspase9 suicide genes. C. Transfection efficiency of PG13-iCasp9-  
 37 G and PG13-iCasp9-A after sorting with CD19 or CD34 labeling.

38

39 **Figure S3**

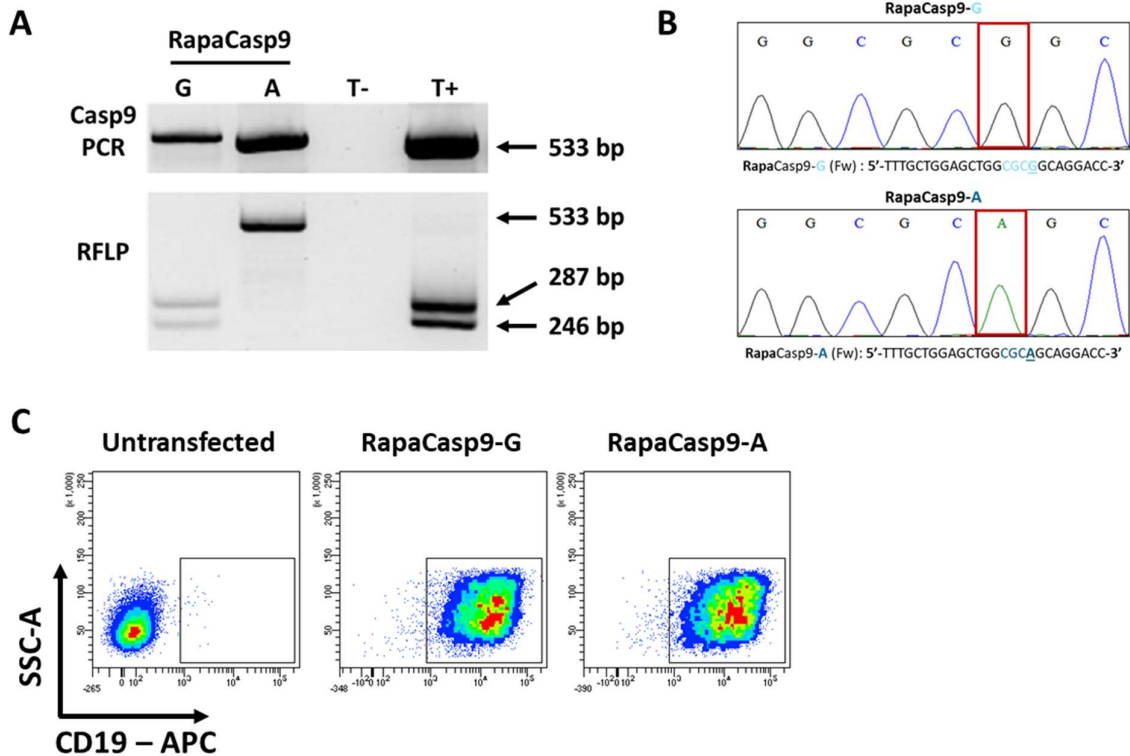

40

41 **Figure S3. Generation of RapaCaspase9 suicide gene plasmids.** A. Restriction fragment length  
 42 polymorphism of lentiviral RapaCaspase9 plasmids targeting the site-directed mutagenesis  
 43 site. PCR targeting the Casp9 suicide genes was performed, and the PCR products underwent  
 44 enzymatic restriction with the *Bst*UI enzyme and migration in an agarose gel. The negative  
 45 control (T-) contained water instead of DNA, and the positive control (T+) contained a  
 46 validated plasmid with a G nucleotide. B. Validation of the site-directed mutagenesis by Sanger  
 47 sequencing of the Casp9 suicide genes. C. Representative dot plots of the transfection  
 48 efficiency for HEK-293T cells transfected with RapaCasp9-G and RapaCasp9-A lentiviral  
 49 plasmids.

50

51 **Figure S4**

52

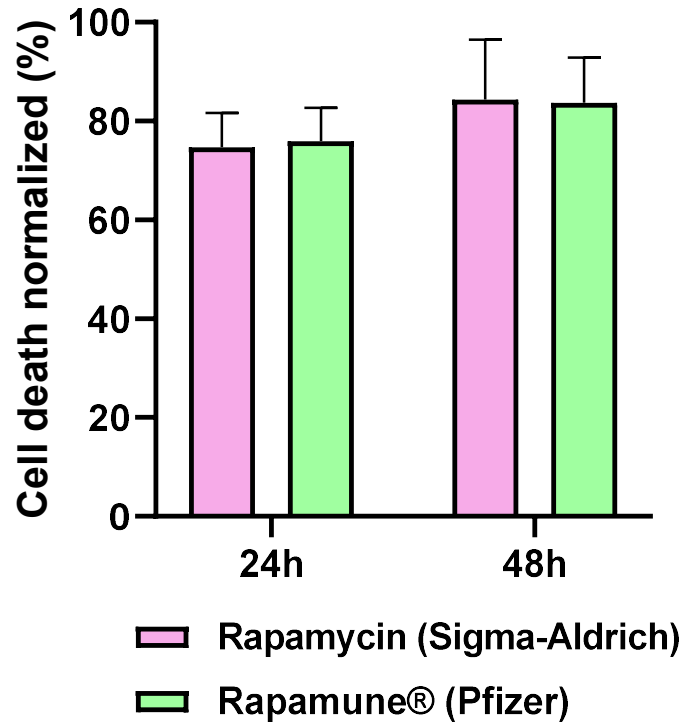

53

54

55 **Figure S4. Functional validation of RapaCasp9-G suicide gene, induced by rapamycin**

56 **produced for research and Rapamune® pill.** Cell death percentages of RapaCasp9-G-

57 expressing GMTCs during 24 and 48 hours after rapamycin exposure. Cells were exposed to

58 109 nM rapamycin from Sigma-Aldrich (produced for research) or from Rapamune® pill

59 (commercialized rapamycin), and normalized to control cells (DMSO treated). Cell death was

60 evaluated by Annexin-V/7-AAD labeling and gating on CD3<sup>+</sup>/CD19<sup>+</sup> cells by flow cytometry.

61 Mean ± SD of three independent experiments.

62

63 **Figure S5**

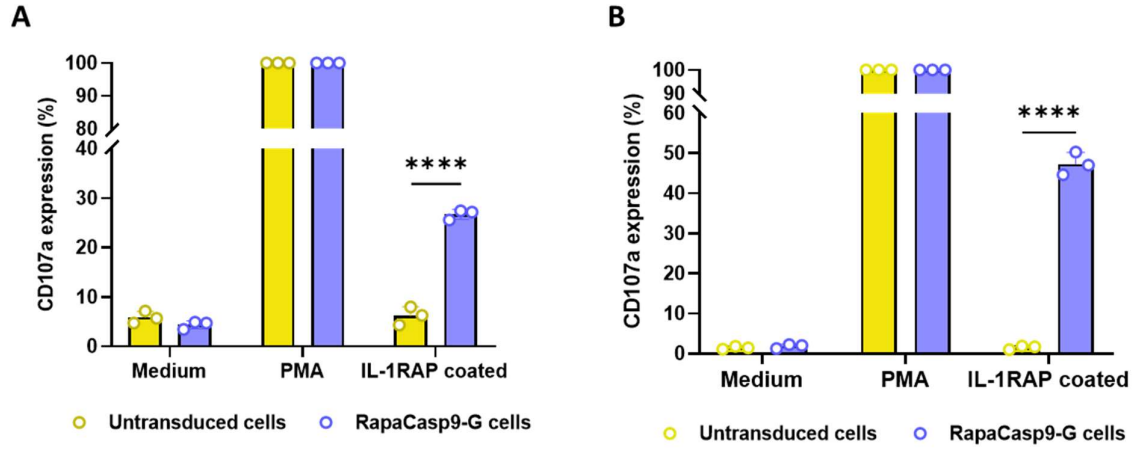

64

65 **Figure S5. IL-1RAP stimulation validation by CD107a degranulation assay of RapaCasp9-G-**  
 66 **expressing GMTCs.** Analysis of CD107a degranulation assay of RapaCasp9-G-expressing  
 67 GMTCs cells after stimulation with IL-1RAP bounded protein during 24 hours **A.** Percentages  
 68 of total CD3<sup>+</sup>/CD19<sup>+</sup>/CD8<sup>+</sup>/CD107a<sup>+</sup> in untransduced or RapaCasp9-expressing GMTCs from  
 69 AML patients. Mean ± SD of three independent experiments. \*\*\*\* P<0.0001 with two-way  
 70 Anova. **B/** Percentages of total CD3<sup>+</sup>/CD19<sup>+</sup>/CD8<sup>+</sup>/CD107a<sup>+</sup> in untransduced or RapaCasp9-  
 71 expressing GMTCs from HDs after thawing. Mean ± SD of three independent experiments.  
 72 \*\*\*\* P<0.0001 with two-way Anova.

73

74 **Figure S6**

75

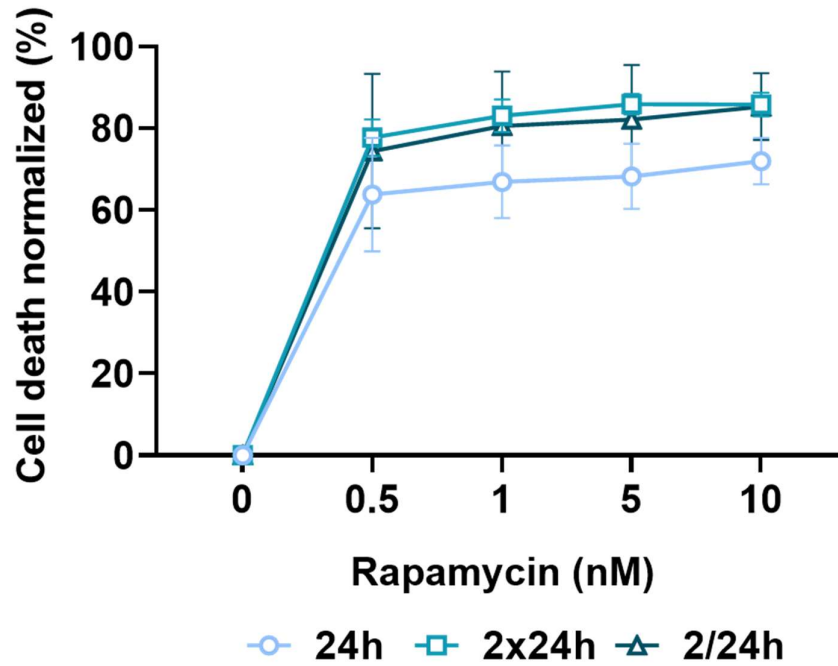

76

77

78 **Figure S6. Timing improvement for suicide gene induction in RapaCasp9-expressing GMTCs.**

79 Killing curve after exposure to rapamycin at doses ranging from 0.5 nM to 10 nM. RapaCasp9-

80 G-expressing GMTCs were exposed to rapamycin during 24 hours (24h), to two successive

81 doses of rapamycin during 24 hours with cells washing between each dose (2x24h), and two

82 successive half-doses of rapamycin added 24 hours apart (2/24h). Mean  $\pm$  SD of three

83 independent experiments.
